# Supplementary material
Source: MDPI journal article supplement (https://www.mdpi.com/search?q=molbank-2022-M1492)
Supplement: s002 [file molbank-2022-M1492-s002.mol]

Untitled ACS Document 1996-12
  ChemDraw11072209502D

 19 20  0  0  0  0  0  0  0  0999 V2000
   -2.0706    0.4974    0.0000 C   0  0  0  0  0  0  0  0  0  0  0  0
   -2.0706   -0.3276    0.0000 C   0  0  0  0  0  0  0  0  0  0  0  0
   -1.3561   -0.7401    0.0000 C   0  0  0  0  0  0  0  0  0  0  0  0
   -0.6416   -0.3276    0.0000 C   0  0  0  0  0  0  0  0  0  0  0  0
   -0.6416    0.4974    0.0000 C   0  0  0  0  0  0  0  0  0  0  0  0
   -1.3561    0.9099    0.0000 C   0  0  0  0  0  0  0  0  0  0  0  0
    0.0704   -0.7386    0.0000 C   0  0  0  0  0  0  0  0  0  0  0  0
    0.1566   -1.5591    0.0000 C   0  0  0  0  0  0  0  0  0  0  0  0
    0.9636   -1.7306    0.0000 C   0  0  0  0  0  0  0  0  0  0  0  0
    1.3761   -1.0162    0.0000 C   0  0  0  0  0  0  0  0  0  0  0  0
    0.8240   -0.4031    0.0000 O   0  0  0  0  0  0  0  0  0  0  0  0
    2.1937   -0.9302    0.0000 C   0  0  0  0  0  0  0  0  0  0  0  0
    2.5281   -0.1792    0.0000 O   0  0  0  0  0  0  0  0  0  0  0  0
   -1.3561   -1.5622    0.0000 F   0  0  0  0  0  0  0  0  0  0  0  0
   -2.7826    0.9085    0.0000 N   0  3  0  0  0  0  0  0  0  0  0  0
   -2.7826    1.7306    0.0000 O   0  0  0  0  0  0  0  0  0  0  0  0
   -3.4946    0.4974    0.0000 O   0  5  0  0  0  0  0  0  0  0  0  0
    2.6769   -1.5954    0.0000 O   0  0  0  0  0  0  0  0  0  0  0  0
    3.4946   -1.5094    0.0000 C   0  0  0  0  0  0  0  0  0  0  0  0
  1  2  2  0      
  2  3  1  0      
  3  4  2  0      
  4  5  1  0      
  5  6  2  0      
  6  1  1  0      
  4  7  1  0      
  7  8  2  0      
  8  9  1  0      
  9 10  2  0      
 10 11  1  0      
 11  7  1  0      
 10 12  1  0      
 12 13  2  0      
  3 14  1  0      
  1 15  1  0      
 15 16  2  0      
 15 17  1  0      
 12 18  1  0      
 18 19  1  0      
M  CHG  2  15   1  17  -1
M  STY  1   1 SUP
M  SLB  1   1   1
M  SAL   1  3  15  16  17
M  SBL   1  1  16
M  SMT   1 ^NO2
M  SBV   1  16    0.7120   -0.4111
M  STY  1   2 SUP
M  SLB  1   2   2
M  SAL   2  2  18  19
M  SBL   2  1  19
M  SMT   2 OCH3
M  SBV   2  19   -0.4832    0.6651
M  END
